Table S2: Percent difference (d-values) between bacterial communities of different artificial soils per treatment (control, phenanthrene (+P), litter (+L), litter and phenanthrene [+L+P]) 21 days after spiking. D-values were calculated based on pairwise Pearson similarity coefficients and were significant for all comparisons ( $p < 0.05$ ). Q-quartz, M-montmorillonite, C-charcoal, I-illite, F-ferrihydrite.

| % difference | control | +P    | +L    | +L+P  |
|--------------|---------|-------|-------|-------|
| QM vs. QMC   | 13.25   | 33.16 | 30.52 | 26.75 |
| QM vs. QI    | 40.62   | 55.1  | 38.86 | 34.65 |
| QM vs. QIF   | 38.53   | 70.05 | 46.43 | 45.28 |
| QMC vs. QI   | 29.51   | 33.34 | 25.08 | 23.83 |
| QMC vs. QIF  | 24.66   | 52.73 | 40.03 | 32.18 |
| QI vs. QIF   | 16.54   | 29.44 | 13.19 | 15.69 |
